# Supplementary material for: A Study of Microfiber Phytoremediation in Vertical Hydroponics
Source: MDPI journal article supplement (doi:10.3390/su15042851), 2023-02-04
Supplement: s1 [file s1]

# **A study of Microfiber Phytoremediation in Vertical Hydroponics**

**Naiara dos Santos <sup>1</sup>, Dominic Clyde-Smith <sup>1</sup>, Ying Qi <sup>1</sup>, Fan Gao <sup>1</sup>, Rosa Busquets <sup>1,2</sup>, and Luiza C. Campos <sup>1\*</sup>**

<sup>1</sup>Department of Civil, Environmental and Geomatic Engineering, Faculty of Engineering, University College London, London WC1E 6BT, UK

<sup>2</sup>Kingston University, Faculty of Health, Science, Social Care and Education, School of Pharmacy and Chemistry, Kingston Upon Thames KT1 2EE, UK

\* [l.campos@ucl.ac.uk](mailto:l.campos@ucl.ac.uk)

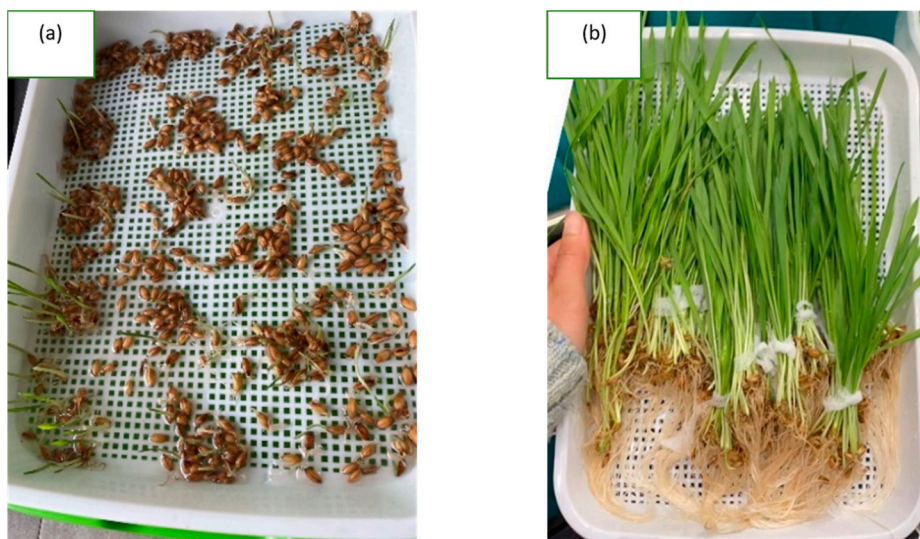

**Figure S1.** Preliminary stage of barley cultivation for phytoremediation experiments: (a) germination stage and (b) grown barley to be used in the study.

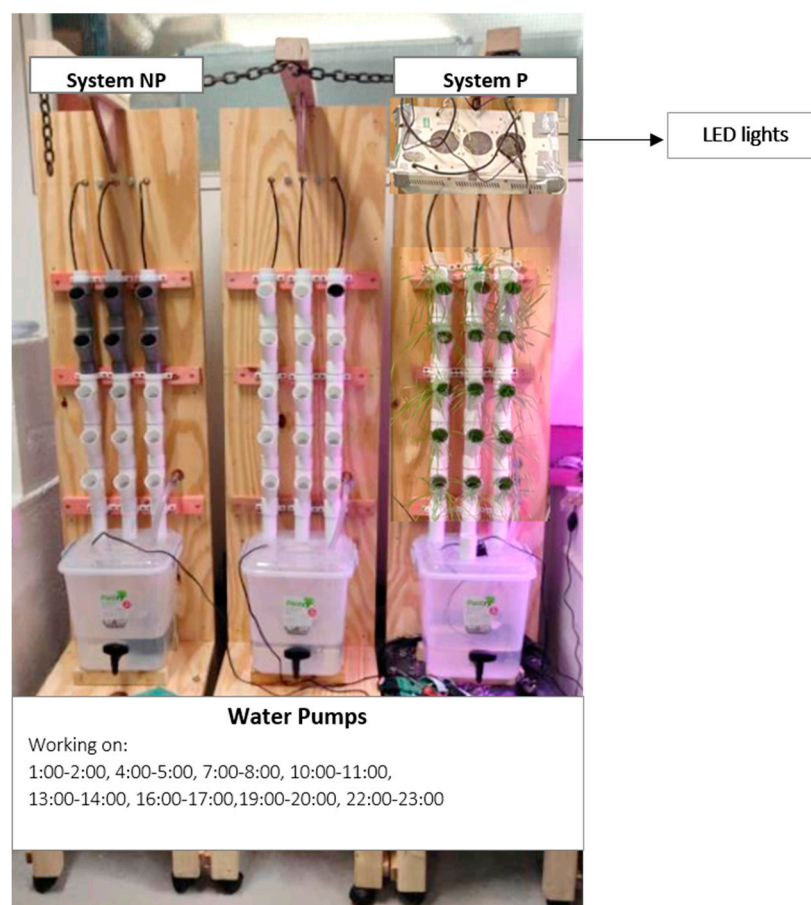

**Figure S2.** Apparatus of vertical hydroponics system. System NP: no plants (control), and System P: with plants (barley).

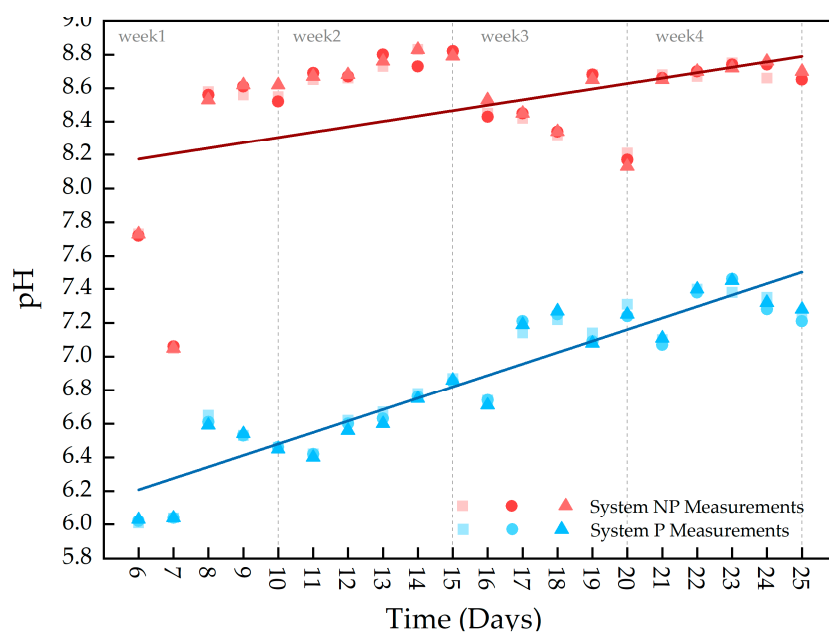

**Figure S3.** Variation in pH ( $n = 3$ ) in the water reservoir of Systems NP and P. Trendlines are added.

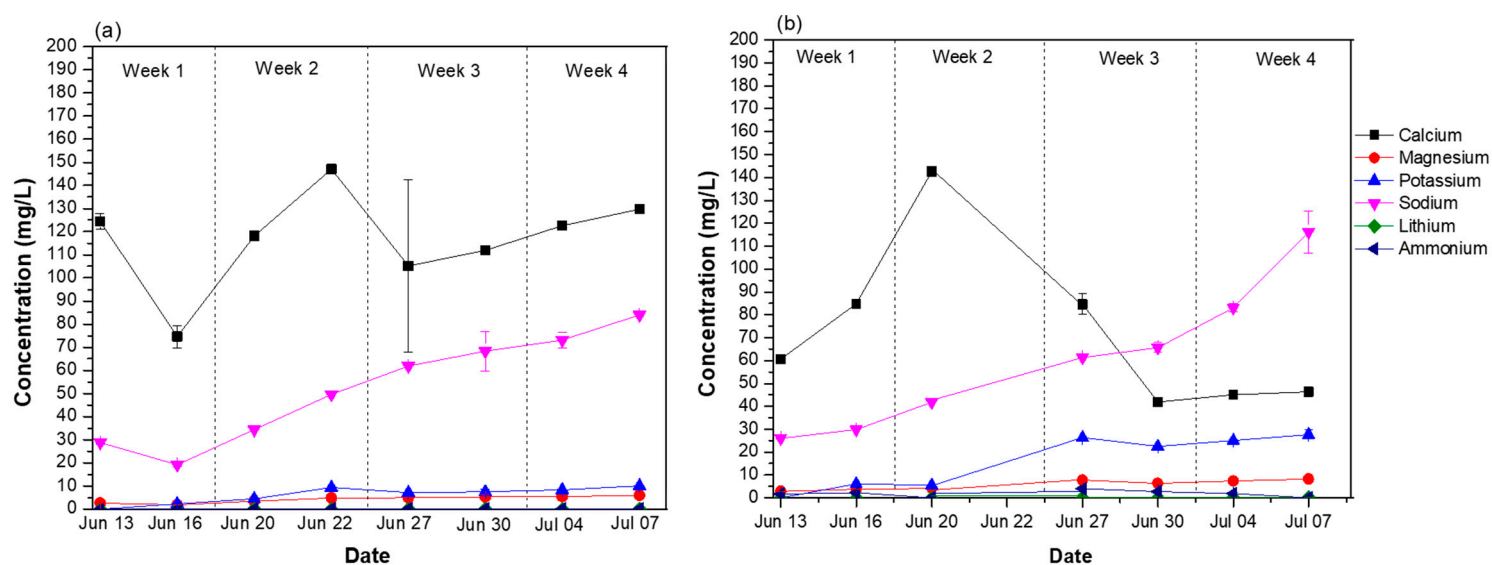

**Figure S4.** Variation in cation concentrations ( $n = 2$ ) in the water reservoir of (a) System NP and (b) System P.

**Table S1.** Barley root growth during 4 weeks of vertical hydroponics.

|        | Roots                                                                                                                                                                                                                                                   | Top row                                                                                                | Middle row                                                                                              | Bottom row                                                                                              |
|--------|---------------------------------------------------------------------------------------------------------------------------------------------------------------------------------------------------------------------------------------------------------|--------------------------------------------------------------------------------------------------------|---------------------------------------------------------------------------------------------------------|---------------------------------------------------------------------------------------------------------|
| Week 1 | <p>All roots are firm, white, and numerous, with good root development of lateral roots.</p> <p>The length of the top roots is around 17 cm. The middle roots are slightly shorter (15 cm), and the bottom roots are near 15 cm but less intensive.</p> |  <p>around 17 cm</p> |  <p>around 15 cm</p> |  <p>around 15 cm</p> |

|               |                                                                                                                                                                                                                                                                                                                                                                               |                                                                                                        |                                                                                                         |                                                                                                           |
|---------------|-------------------------------------------------------------------------------------------------------------------------------------------------------------------------------------------------------------------------------------------------------------------------------------------------------------------------------------------------------------------------------|--------------------------------------------------------------------------------------------------------|---------------------------------------------------------------------------------------------------------|-----------------------------------------------------------------------------------------------------------|
| <p>Week 2</p> | <p>All roots become slightly dry, and the color is not as white as last week.</p> <p>Top roots grow in good condition, with some lateral roots found at the bottom. The root length remains unchanged.</p> <p>The middle roots grow well with a few lateral roots.</p> <p>The bottom roots are slightly compressed in size, especially in the extremities of their roots.</p> |  <p>around 17 cm</p> |  <p>around 15 cm</p> |  <p>around 14.5 cm</p> |
|---------------|-------------------------------------------------------------------------------------------------------------------------------------------------------------------------------------------------------------------------------------------------------------------------------------------------------------------------------------------------------------------------------|--------------------------------------------------------------------------------------------------------|---------------------------------------------------------------------------------------------------------|-----------------------------------------------------------------------------------------------------------|



|               |                                                                                                                                                                                                                                                                                                                                                                                                                     |                                                                                                        |                                                                                                         |                                                                                                            |
|---------------|---------------------------------------------------------------------------------------------------------------------------------------------------------------------------------------------------------------------------------------------------------------------------------------------------------------------------------------------------------------------------------------------------------------------|--------------------------------------------------------------------------------------------------------|---------------------------------------------------------------------------------------------------------|------------------------------------------------------------------------------------------------------------|
| <p>Week 3</p> | <p>All roots are infected with floccule, and root lengths show different degrees of reduction.</p> <p>Top roots start to turn brown. However, the newly grown, neat, lateral roots can be easily distinguished at the end.</p> <p>Middle roots become brown and sparse, with a few new lateral roots.</p> <p>Bottom roots are sparse and brown. There are black spots apparent on the top pattern of the roots.</p> |  <p>around 16 cm</p> |  <p>around 14 cm</p> |  <p>less than 14 cm</p> |
|---------------|---------------------------------------------------------------------------------------------------------------------------------------------------------------------------------------------------------------------------------------------------------------------------------------------------------------------------------------------------------------------------------------------------------------------|--------------------------------------------------------------------------------------------------------|---------------------------------------------------------------------------------------------------------|------------------------------------------------------------------------------------------------------------|

|               |                                                                                                                                                                                                                                                                                                                                                                                                      |                                                                                                        |                                                                                                         |                                                                                                        |
|---------------|------------------------------------------------------------------------------------------------------------------------------------------------------------------------------------------------------------------------------------------------------------------------------------------------------------------------------------------------------------------------------------------------------|--------------------------------------------------------------------------------------------------------|---------------------------------------------------------------------------------------------------------|--------------------------------------------------------------------------------------------------------|
| <p>Week 4</p> | <p>The length of roots in all rows shows significant decreases. More floccules adhere to the roots.</p> <p>Top roots are crumbly and dry, with some spots on the top pattern. The new lateral roots become shriveled.</p> <p>Middle roots are also fragile and crumbly.</p> <p>Bottom roots become mushy and black, accompanied by odd odor. The roots have mildew or mold, leading to root rot.</p> |  <p>around 15 cm</p> |  <p>around 13 cm</p> |  <p>around 11cm</p> |
|---------------|------------------------------------------------------------------------------------------------------------------------------------------------------------------------------------------------------------------------------------------------------------------------------------------------------------------------------------------------------------------------------------------------------|--------------------------------------------------------------------------------------------------------|---------------------------------------------------------------------------------------------------------|--------------------------------------------------------------------------------------------------------|

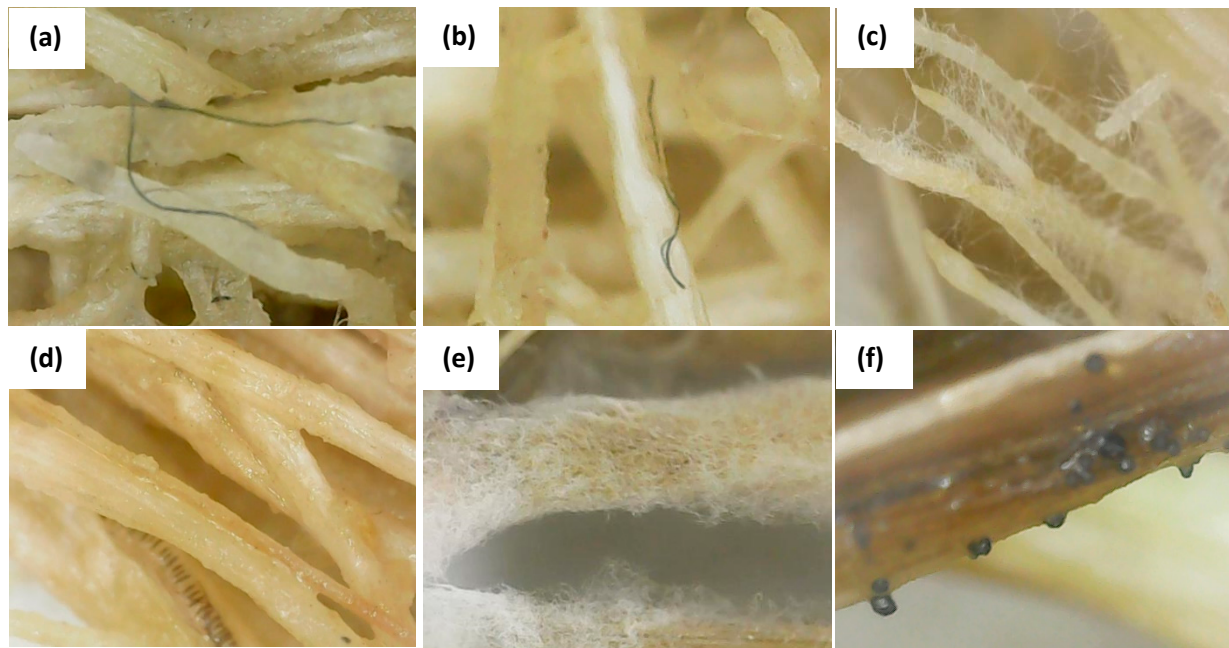

**Figure S5.** (a) MFs captured on roots from the top row; (b) MF are trapped in the healthy and neat roots instead of dying, brown roots; (c) intensive root network; (d) existence of worms; (e) existence of fungi; (f) black spots on roots.



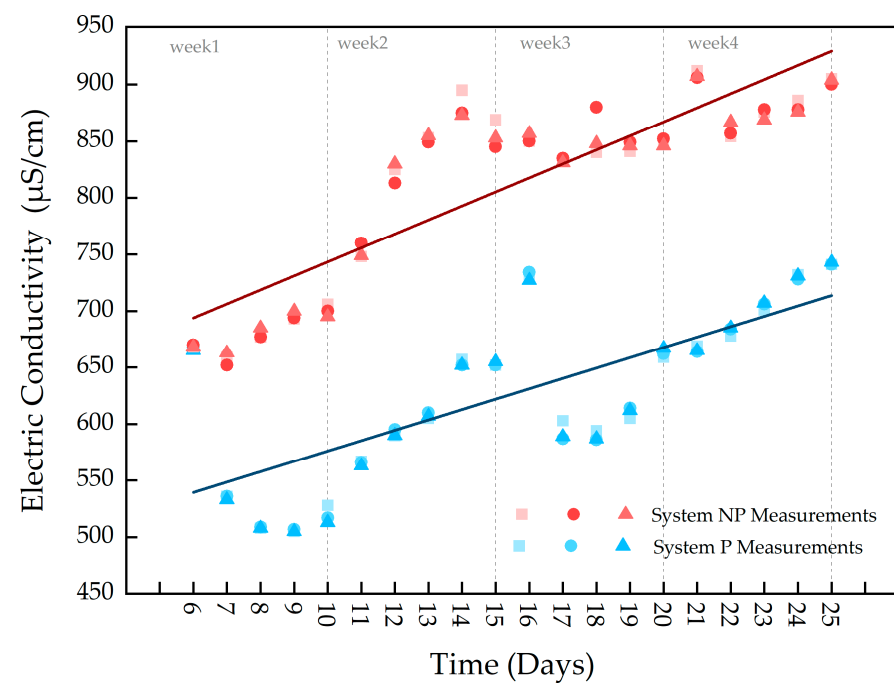

**Figure S6.** Variation in EC ( $n = 3$ ) in the water reservoirs of Systems NP and P. Trendlines are added.

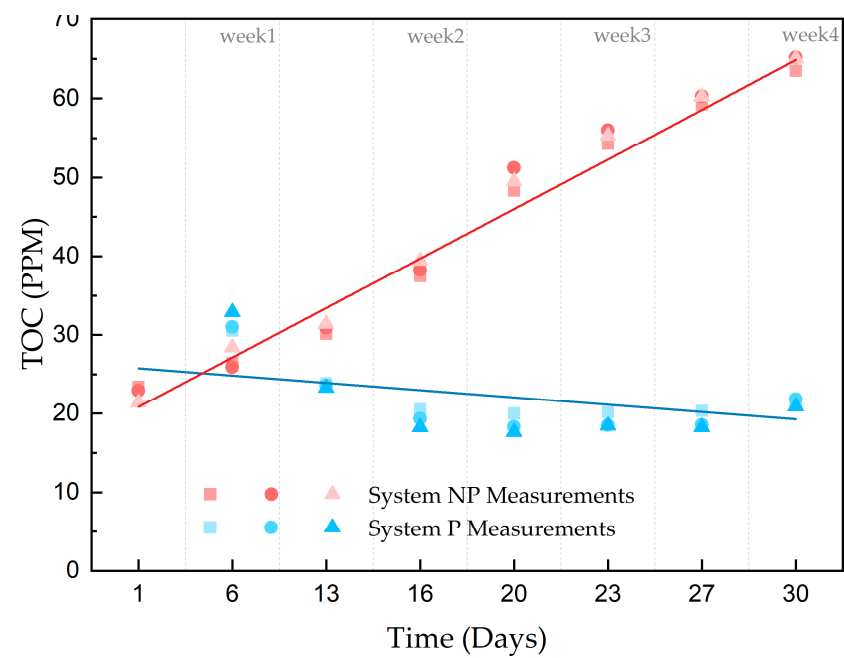

**Figure S7.** Variation in TOC (n=3) in the water reservoirs of Systems NP and P. Trendlines are added.

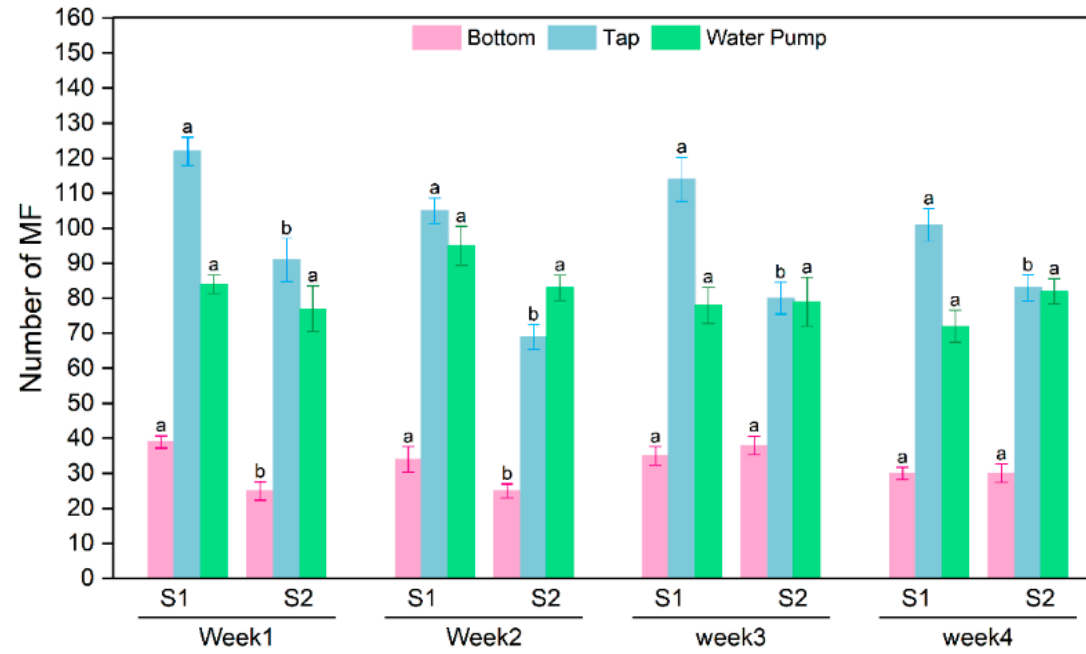

**Figure S8.** Results of ANOVA analysis ( $n = 3$ ) of MF abundance in the bottom, tap, and pump of the water reservoir, where “a” means significantly different, while “b” means insignificantly different. S1 means System 1 (system without plants: NP) and S2 means System 2 (system with plants: P).
